# Supplementary material for: miR-125-3p and miR-276b-3p Regulate the Spermatogenesis of Bactrocera dorsalis by Targeting the orb2 Gene
Source: MDPI journal article supplement (doi:10.3390/genes13101861), 2022-10-15
Supplement: s1 [file s1]

**Table S1**

**PCR primers used for RT-PCR and qRT-PCR analyses.**

|                                 |                                                |
|---------------------------------|------------------------------------------------|
| For cloning 3UTR of <i>orb2</i> |                                                |
| <i>Orb2-F</i>                   | CCCTCGAGAAATAGCAATGCGTCAGGTG                   |
| <i>Orb2-R</i>                   | TTGCGGCCGCAGCTGCTGTACACTATTCTCA                |
| For dsRNA synthesis             |                                                |
| <i>Orb2-F</i>                   | GGATCCTAATACGACTCACTATAGGCCTACTTGGATGGCAATATGA |
| <i>Orb2-R</i>                   | GGATCCTAATACGACTCACTATAGGATAGCAAACACCACCATACA  |
| <i>dsGFP-F</i>                  | GGATCCTAATACGACTCACTATAGGATACGGCGTGCAGTGCT     |
| <i>dsGFP-R</i>                  | GGATCCTAATACGACTCACTATAGGATGATCGCGCTTCTCG      |
| For-qRT PCR                     |                                                |
| <i>orb2-F</i>                   | ATGTAAGCGCCTATCATGTG                           |
| <i>orb2-R</i>                   | AGCTTGCGATCCGTTATATG                           |
| <i>miR-125-3p</i>               | ACAAGTTTTGATCTCCGGTAT                          |
| <i>miR-276b-3p</i>              | TAGGAACTTAATACCGTGCTCT                         |
| <i>Actin-F</i>                  | CGTTTCCGTTGCCCAGAATTCC                         |
| <i>Actin-R</i>                  | TCAGCAATACCTGGGTACATG                          |
| <i>U6</i>                       | AGGATGACACGCAAAATCGT                           |

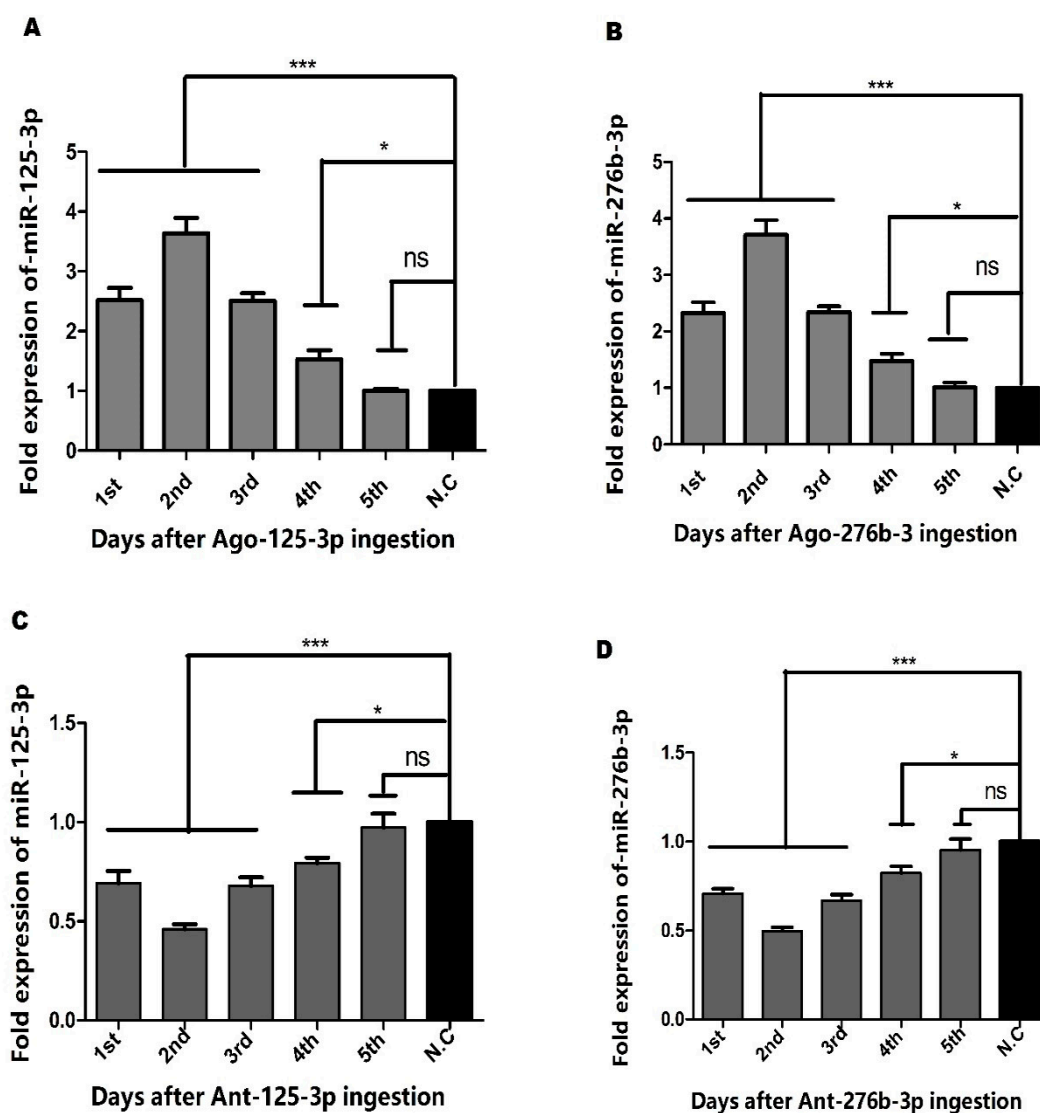

**Figure S1:** Fold expression of miR-125-3p and miR-276b-3p after feeding of agomirs and antagomirs (A) Fold expression of miR-125-3p after ingestion of agomir-125-3p. (B) Fold expression of miR-276b-3p after ingestion of a mir-276b-3p. (C) Expression of miR-125-3p after ingestion of antagomir-125-3p. (D) Fold expression of miR-276b-3p after ingestion of antagomir-276b-3p (N. C) Represents Negative Control Three independent biological replicates were performed. One way Anova was used to analyze the results ( $P < 0.0001$ , Tuckey test). miR-125-3p and miR-276b-3p expression was normalized to U6.
